# Supplementary material for: East Asian summer monsoon delivers large abundances of very short-lived organic chlorine substances to the lower stratosphere
Source: PubMed Central journal article supplement — Proc Natl Acad Sci U S A. 2024 Mar 14;121(12):e2318716121. doi: 10.1073/pnas.2318716121 (PMC10962947; doi:10.1073/pnas.2318716121), 2024-03-14
Supplement: pnas.2318716121.sapp.pdf [file pnas.2318716121.sapp.pdf]

## Supporting Information for

### East Asian summer monsoon delivers large abundances of very-short-lived organic chlorine substances to the lower stratosphere

Laura L. Pan<sup>1,\*</sup>, Elliot L. Atlas<sup>2</sup>, Shawn B. Honomichl<sup>1</sup>, Warren P. Smith<sup>1</sup>, Douglas E. Kinnison<sup>1</sup>, Susan Solomon<sup>3</sup>, Michelle L. Santee<sup>4</sup>, Alfonso Saiz-Lopez<sup>5</sup>, Johannes C. Laube<sup>6</sup>, Bin Wang<sup>7</sup>, Rei Ueyama<sup>8</sup>, James F. Bresch<sup>9</sup>, Rebecca S. Hornbrook<sup>1</sup>, Eric C. Apel<sup>1</sup>, Alan J. Hills<sup>1</sup>, Victoria Treadaway<sup>2,10,11</sup>, Katie Smith<sup>2</sup>, Sue Schauffler<sup>1,2</sup>, Stephen Donnelly<sup>2,12</sup>, Roger Hendershot<sup>1,2</sup>, Richard Lueb<sup>1,2</sup>, Teresa Campos<sup>1</sup>, Silvia Viciani<sup>13</sup>, Francesco D'Amato<sup>13</sup>, Giovanni Bianchini<sup>13</sup>, Marco Barucci<sup>13</sup>, James R. Podolske<sup>8</sup>, Laura T. Iraci<sup>8</sup>, Colin Gurganus<sup>10,11</sup>, Paul Bui<sup>8,14</sup>, Jonathan M. Dean-Day<sup>8,14</sup>, Luis Millán<sup>4</sup>, Ju-Mee Ryoo<sup>8,15</sup>, Barbara Barletta<sup>16</sup>, Ja-Ho Koo<sup>17</sup>, Joowan Kim<sup>18</sup>, Qing Liang<sup>19</sup>, William J. Randel<sup>1</sup>, Troy Thornberry<sup>11</sup> and Paul A. Newman<sup>19</sup>

<sup>1</sup>Atmospheric Chemistry Observations and Modeling Laboratory, NSF National Center for Atmospheric Research, Boulder, CO, 80301

<sup>2</sup>Rosenstiel School of Marine, Earth, and Atmospheric Science, Department of Atmospheric Sciences, University of Miami, Miami, FL, 33149

<sup>3</sup>Department of Earth, Atmospheric, and Planetary Sciences, Massachusetts Institute of Technology, Cambridge, MA, 02139

<sup>4</sup>Jet Propulsion Laboratory (JPL), California Institute of Technology, Pasadena, CA, 91109

<sup>5</sup>Department of Atmospheric Chemistry and Climate, Institute of Physical Chemistry Blas Cabrera, CSIC, Madrid, Spain 28006

<sup>6</sup> Institute for Energy and Climate Research (IEK-7), Forschungszentrum Jülich, Jülich, Germany 52425

<sup>7</sup>Department of Atmospheric Sciences and IPRC, The University of Hawaii, Honolulu, HI, 96822

<sup>8</sup>NASA Ames Research Center, Moffett Field, CA, 94035

<sup>9</sup>Mesoscale and Microscale Meteorology Laboratory, NSF National Center for Atmospheric Research, Boulder, CO, 80301

<sup>10</sup>Cooperative Institute for Research in Environmental Sciences, University of Colorado Boulder, Boulder, CO, 80309

<sup>11</sup>NOAA Chemical Sciences Laboratory, Boulder, CO, 80305

<sup>12</sup> Department of Chemistry, Fort Hays State University, Hays, KS, 67601

<sup>13</sup>National Institute of Optics, National Research Council, Sesto Fiorentino, Italy 50019

<sup>14</sup>Bay Area Environmental Research Institute, Moffett Field, CA, 94035

<sup>15</sup>Science and Technology Corporation, Moffett Field, CA, 94035

<sup>16</sup>Department of Chemistry, University of California Irvine, Irvine, CA, 92697

<sup>17</sup>Department of Atmospheric Sciences, Yonsei University, Seoul, Republic of Korea 03722

<sup>18</sup>Department of Atmospheric Science, Kongju National University, Gongju, Republic of Korea  
32588

<sup>19</sup>NASA Goddard Space Flight Center, Greenbelt, MD 20771

**Corresponding Author:** Laura Pan and Elliot Atlas

**Email:** [liwen@ucar.edu](mailto:liwen@ucar.edu), [eatlas@rsmas.miami.edu](mailto:eatlas@rsmas.miami.edu)

**This PDF file includes:**

Supporting text  
Figures S1 to S2  
Table S1

## Supporting Information Text

### 1. ACCLIP campaign

The ACCLIP (Asian summer monsoon Chemical and CLimate Impact Project) campaign conducted *in situ* measurements of a wide range of trace gas and aerosol species in the UTLS using two high-altitude research aircraft: the National Science Foundation (NSF)/National Center for Atmospheric Research (NCAR) research aircraft Gulfstream V (GV) and the National Aeronautics and Space Administration (NASA) WB-57. The primary science goal is to investigate the impacts of Asian gas and aerosol emissions on global chemistry and climate via the linkage of Asian Summer Monsoon (ASM) convection (Pan et al., 2022). The campaign took place July–September 2022 with flight operations conducted from Osan Air Base in the Republic of Korea. Both research aircraft had extensive payloads of trace gas, aerosol and cloud measurements, with 17 sensors on the WB-57 and 16 on the GV. With the ACCLIP payload, the WB had a flight ceiling of ~19 km and primarily operated at altitudes between 13 and 19 km. The GV flight ceiling is near 15 km, and it sampled a vertical range of 500 m ASL to the ceiling. The two aircraft flew 15 (WB-57) and 14 (GV) research flights over the northwestern Pacific domain (Fig. S1) from July 31 to September 1, 2022, in support of ACCLIP science goals.

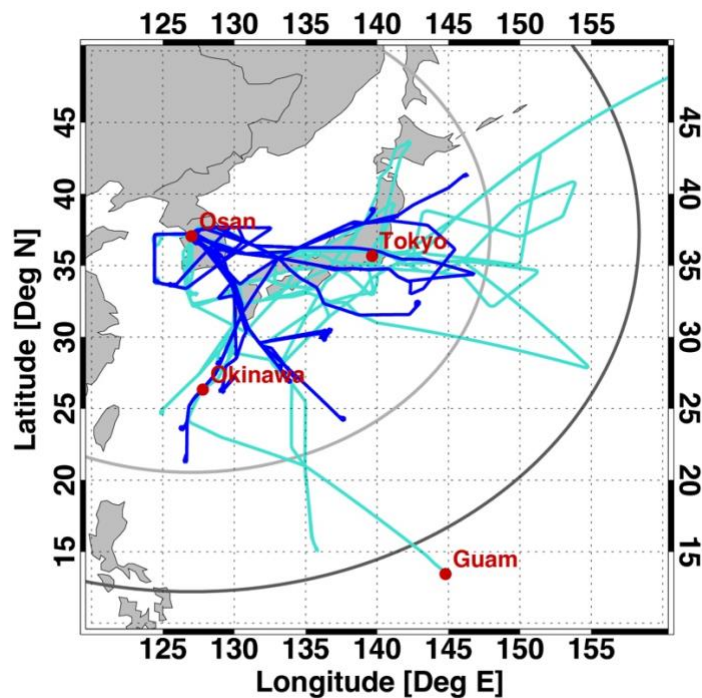

**Figure S1. Map of ACCLIP operational domain and research flight tracks.** The GV flight tracks (cyan) indicate the nominal range of 3000 nautical miles and ~ 8 hour duration. The WB-57 flight tracks (blue) correspond to a nominal range of 2000 nautical miles or ~ 6 hour duration. The range rings for the two aircraft are 1000 (light gray) and 1500 (dark gray) nautical miles respectively. The 29 research flights were conducted during July 31- September 1, 2022.

2. CI-VSLs measured during ACCLIP – Table S1

Table S1. CI-VSLs measured during ACCLIP.  
Compounds in bold have median concentrations above 1 pptv

|    | COMPOUND                   | TOGA | AWAS |
|----|----------------------------|------|------|
| 1  | <b>dichloromethane</b>     | x    | x    |
| 2  | <b>1,2-dichloroethane</b>  | x    | x    |
| 3  | <b>chloroform</b>          | x    | x    |
| 4  | <b>1,2-dichloropropane</b> | x    | x    |
| 5  | <b>tetrachloroethene</b>   | x    | x    |
| 6  | chlorobenzene              | x    | x    |
| 7  | 1,1,2-trichloroethane      | x    |      |
| 8  | bromodichloromethane       | x    | x    |
| 9  | bromochloromethane         |      | x    |
| 10 | trichloroethene            | x    | x    |
| 11 | dibromochloromethane       | x    | x    |
| 12 | cis-1,2-dichloroethene     | x    |      |
| 13 | trans-1,2-dichloroethene   | x    |      |
| 14 | 1,1-dichloroethene         | x    |      |
| 15 | chloroethene               | x    |      |
| 16 | chloroethane               | x    |      |

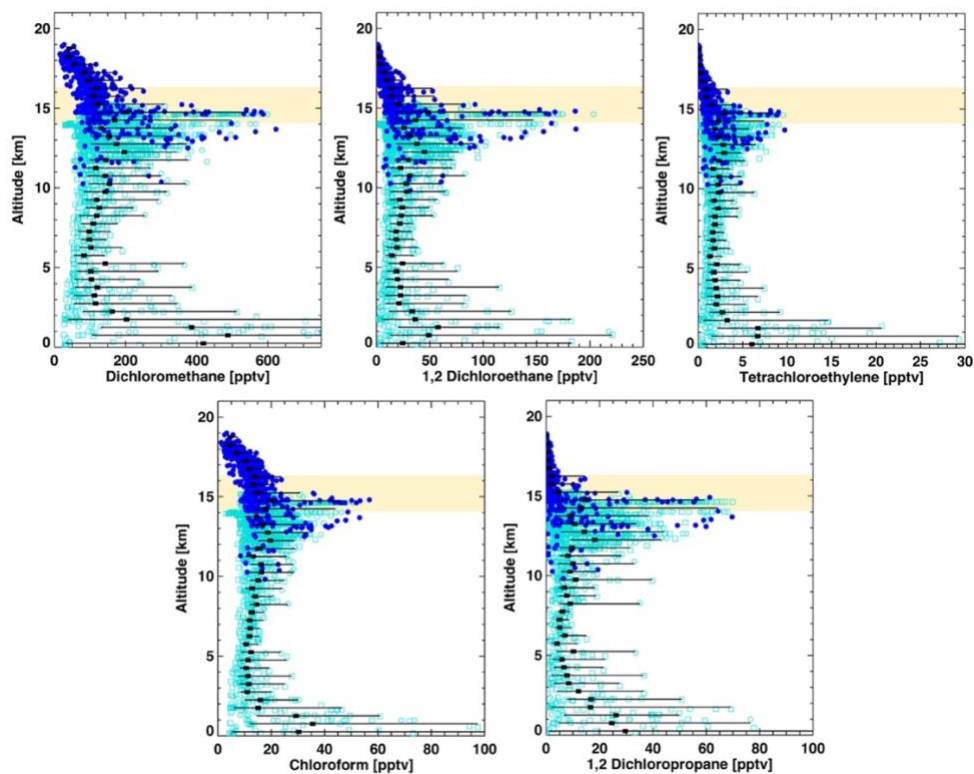

**Figure S2. Vertical distributions of five CI-VSLs that make significant contributions to the total organic chlorine in the UTLS.** The data displayed are measurements from the WAS on the WB-57 (blue), AWAS on the GV (cyan squares), and TOFA-TOF on the GV (cyan circles) from all research flights. The mean value and the 5<sup>th</sup> to 95<sup>th</sup> percentiles for each 500-m layer are shown by the filled squares and the thin lines (black), respectively. The layer of 360–380 K potential temperature is shaded beige.
